# Supplementary material
Source: PubMed Central journal article supplement (PMC4458722)

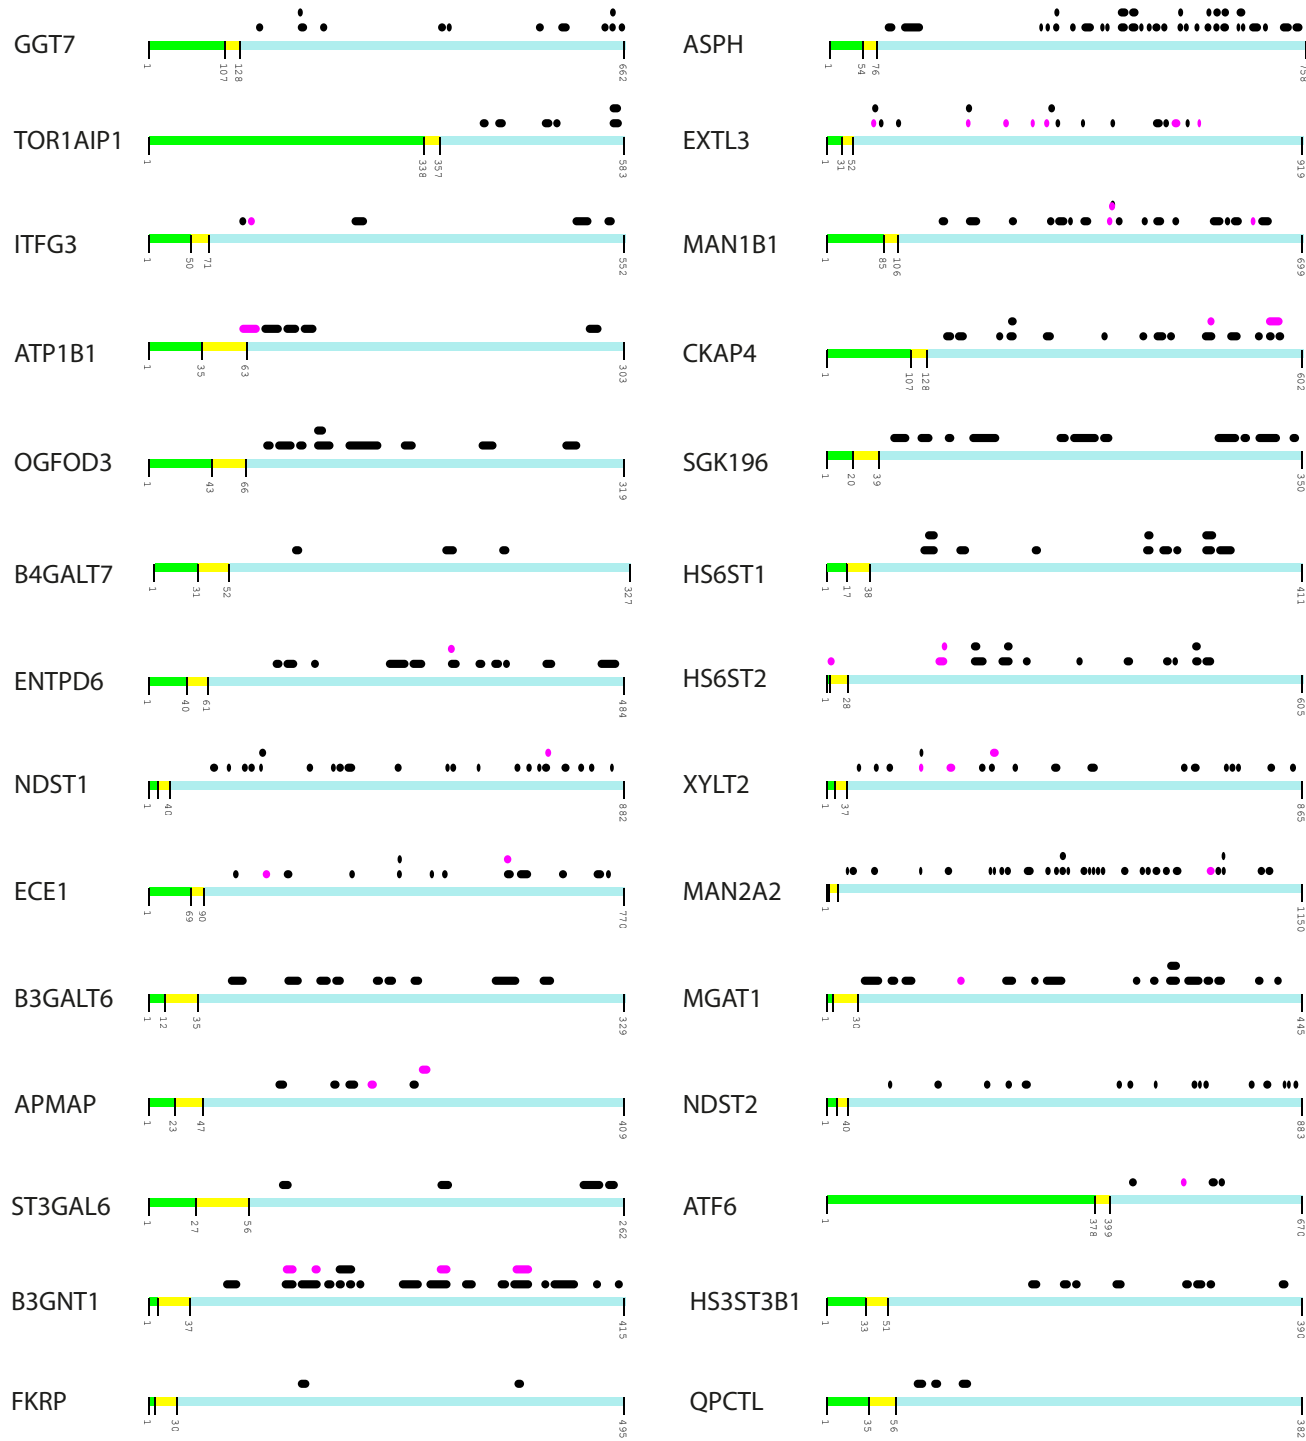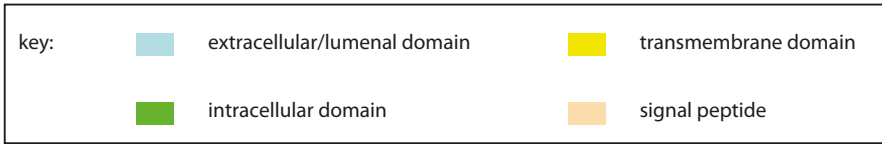

Supplement: supp_M115.048298_mcp.M115.048298-1.pdf [file supp_M115.048298_mcp.M115.048298-1.pdf]

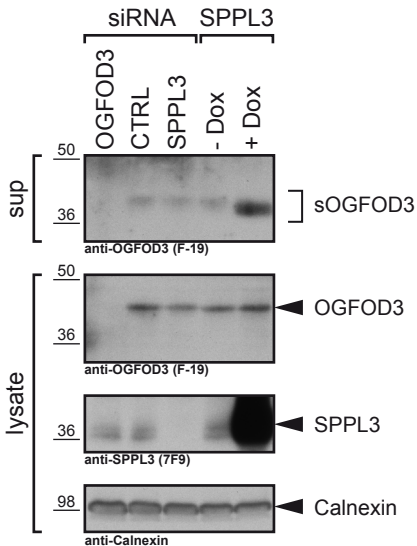

Supplement: supp_M115.048298_mcp.M115.048298-2.pdf [file supp_M115.048298_mcp.M115.048298-2.pdf]

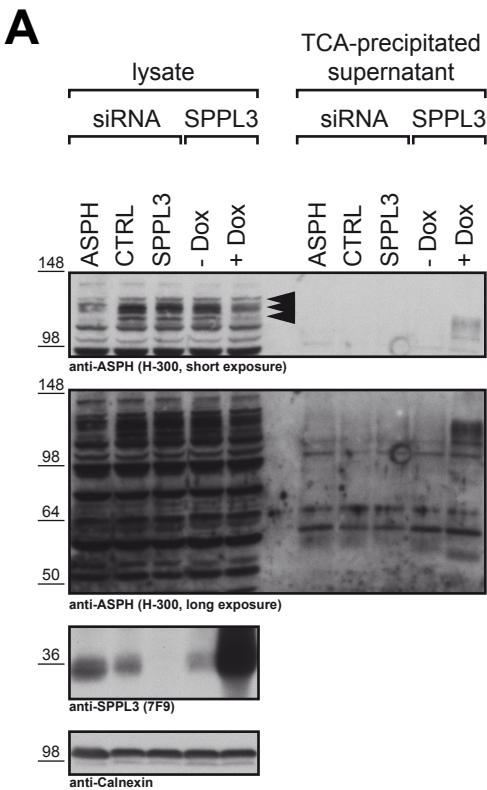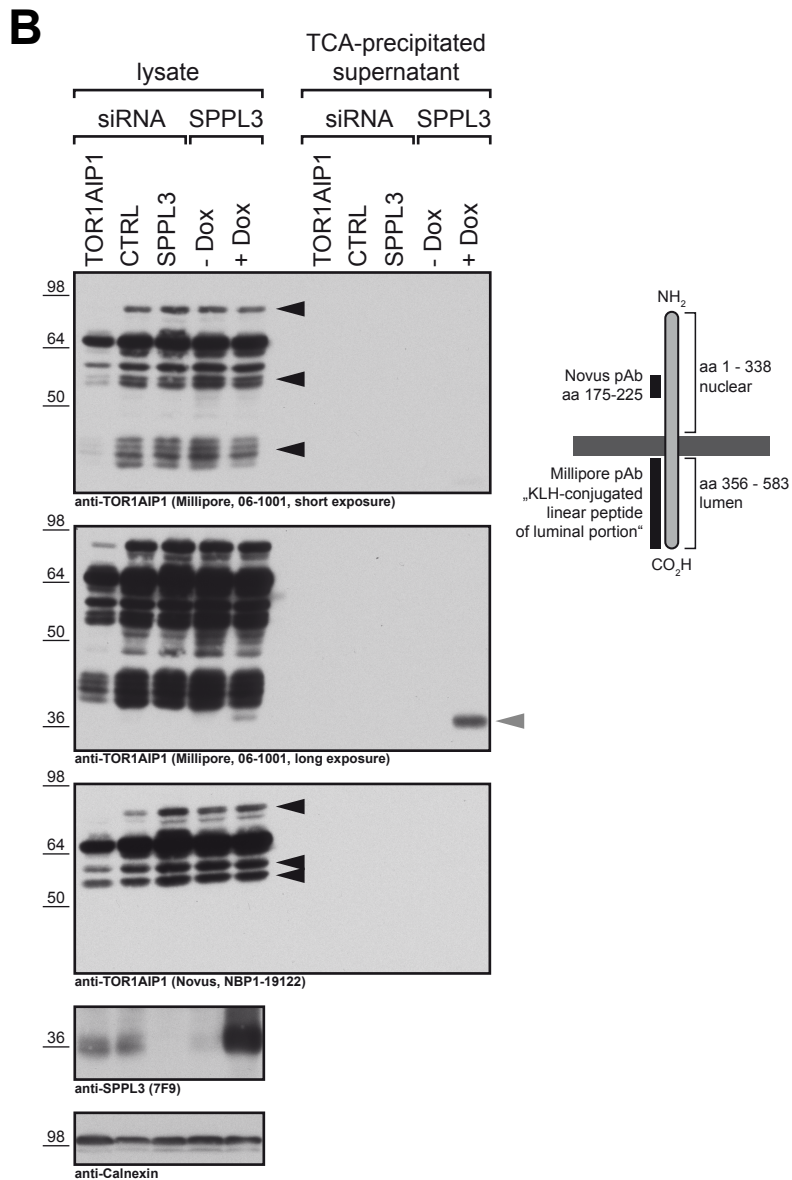

Supplement: supp_M115.048298_mcp.M115.048298-3.pdf [file supp_M115.048298_mcp.M115.048298-3.pdf]
